# Supplementary material for: Founder mutation in myosin-binding protein C with an early onset and a high penetrance in males
Source: HighWire-hosted journal article supplement (doi:10.1136/openhrt-2021-001789), 2021-09-01

Agarose gel (2%)  
PCR fragment (exon 22-24 cDNA)

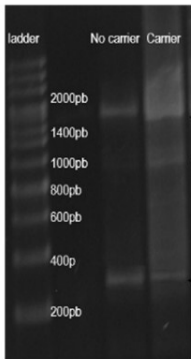

← gDNA (+ control)  
1685 pb

← Expected size  
960 bp cDNA(+intron)

← Expected size  
310 bp cDNA fragment

**MBP33 PROTEIN**  
c.2149-1cDNA: NFEPEKFPYAFSEKFRVTEVAAGSPAVFEATERAGVYVNRQ  
GGDISASNKYGLATEGRTCLTVRYGPAQGGVAVLAGSRYVFELEVIEAEKAF  
MLAPAFAPADATAPAEAPAAALGSDAPFFRGSALADFFPQAFDFIQLFPMR  
FDQDETVVGGITFSAATVAGALLKAFVYVFRFGKVDLSKVQCHLGHDTORAK  
VYFELKIDGAPFTGFCVCEVSTDEKFDENRFLVREAMTQGLDLSAFSTSL  
AGGGRKIDRREKCPILDFEELAKKESRSTFDELLAKAKKQVWELLDGAFVETE  
RIAFQVOTDLSGMLKLEKSRDEKFFAFCKELKPAVQSRGKIRLVELADDA  
EYKLENGEIQMSRSTIFESIGAKRTFQRCGLADDAQVCCVYRKCSTELPFR  
EYFLITRFLAQVAVQVQVFECEVTEVSDGAVKLEDOVELPREEYRIRFEKDG  
RHLIINEAMLEDAGHYALCTSGQALAEIVQKLELVQSIADLVGAEQAVFEC  
EYDENVYVLEKSKELVDSRIKYSIRVHLEIDQVPADEADYVFPFQAFACN  
LRAKLRMYELIFVFGQEFRIKLDGKIDQTIQVIGKREILDFEISGDAFVFI  
NQALITQNKAFAPAFADAFEDDQSDSEVFCXKAEKVEYRRLVCLRELPTVYRQD  
RGGATLGRVCCPQQGFCQALFFGAEKQVETD

**MBP33 PROTEIN**  
Reference: NFEPEKFPYAFSEKFRVTEVAAGSPAVFEATERAGVYVNRQ  
GGDISASNKYGLATEGRTCLTVRYGPAQGGVAVLAGSRYVFELEVIEAEKAF  
MLAPAFAPADATAPAEAPAAALGSDAPFFRGSALADFFPQAFDFIQLFPMR  
FDQDETVVGGITFSAATVAGALLKAFVYVFRFGKVDLSKVQCHLGHDTORAK  
VYFELKIDGAPFTGFCVCEVSTDEKFDENRFLVREAMTQGLDLSAFSTSL  
AGGGRKIDRREKCPILDFEELAKKESRSTFDELLAKAKKQVWELLDGAFVETE  
RIAFQVOTDLSGMLKLEKSRDEKFFAFCKELKPAVQSRGKIRLVELADDA  
EYKLENGEIQMSRSTIFESIGAKRTFQRCGLADDAQVCCVYRKCSTELPFR  
EYFLITRFLAQVAVQVQVFECEVTEVSDGAVKLEDOVELPREEYRIRFEKDG  
RHLIINEAMLEDAGHYALCTSGQALAEIVQKLELVQSIADLVGAEQAVFEC  
EYDENVYVLEKSKELVDSRIKYSIRVHLEIDQVPADEADYVFPFQAFACN  
LRAKLRMYELIFVFGQEFRIKLDGKIDQTIQVIGKREILDFEISGDAFVFI  
NQALITQNKAFAPAFADAFEDDQSDSEVFCXKAEKVEYRRLVCLRELPTVYRQD  
RGGATLGRVCCPQQGFCQALFFGAEKQVETD

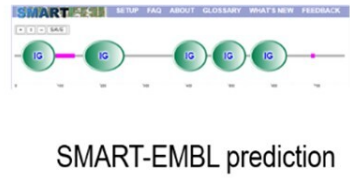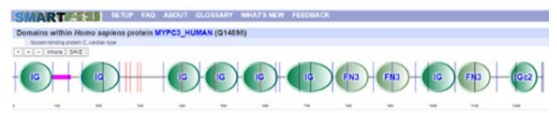

Supplement: openhrt-2021-001789supp001_data_supplement.pdf [file openhrt-2021-001789supp001_data_supplement.pdf]
