# Supplementary material for: Founder mutation in myosin-binding protein C with an early onset and a high penetrance in males
Source: HighWire-hosted journal article supplement (doi:10.1136/openhrt-2021-001789), 2021-09-01
Supplement: openhrt-2021-001789supp002_data_supplement.pdf [file openhrt-2021-001789supp002_data_supplement.pdf]

## **Online Supplementary Material**

### **A founder mutation in Myosin-Binding-Protein C with an early onset and a high penetrance in males**

Irene Méndez, Ana I Fernández, M. Ángeles Espinosa, Sofia Cuenca, Rebeca Lorca,  
Jose Fernando Rodríguez, María Tamargo, Marta García, Cristina Gómez, Silvia  
Vilches, Nélide Vázquez, Reyes Álvarez, Constancio Medrano, Raquel Yotti,  
Francisco Fernández-Avilés, Javier Bermejo

**Table S1. Markers selected for haplotype analysis.**

| <b>Marker ID</b>      | <b>Alleles</b> | <b>Position</b> | <b>MAF Global</b> | <b>MAF Iberian</b> |
|-----------------------|----------------|-----------------|-------------------|--------------------|
| <i>rs7120013</i>      | G/A            | 46,155,938      | 0.375             | 0.411              |
| <i>MYBPC3 c.2149-</i> | G/A            | 47,360,235      | 0                 | 0                  |
| <i>rs4882135</i>      | A/T            | 48,334,369      | 0.354             | 0.449              |
| <i>rs671299</i>       | C/G            | 56,307,532      | 0.349             | 0.309              |
| <i>rs7116652</i>      | C/A            | 58,236,065      | 0.404             | 0.421              |
| <i>rs10792299</i>     | T/G            | 60,721,699      | 0.163             | 0.280              |
| <i>rs11605489</i>     | G/A            | 62,472,357      | 0.455             | 0.365              |

1. MAF: minor allele frequency, HSA11: human chromosome 11

**FIGURE LEGEND:**

**Figure S1. Splicing Analysis**
